# Supplementary material for: CHID1 Is a Novel Prognostic Marker of Non-Small Cell Lung Cancer
Source: PubMed Central journal article supplement (PMC7795388; doi:10.3390/ijms22010450), 2021-01-05
Supplement: ijms-22-00450-s001.pdf [file ijms-22-00450-s001.pdf]

Supplementary table 1.

|                  | CD3 |        |      | p      | CD8 |     |        | p      | FOXP3 |    |     |        | p       |
|------------------|-----|--------|------|--------|-----|-----|--------|--------|-------|----|-----|--------|---------|
|                  | low | medium | high |        | 0   | low | medium |        | high  | 0  | low | medium |         |
| Histology        |     |        |      | 0,705  |     |     |        | 0,768  |       |    |     |        | 0,0005* |
| AC               | 11  | 16     | 24   |        | 1   | 26  | 13     |        | 11    | 17 | 25  | 6      |         |
| SCC              | 13  | 14     | 22   | 1      | 23  | 14  | 11     | 7      | 17    | 16 | 9   |        |         |
| Location         |     |        |      | 0,145  |     |     |        | 0,632  |       |    |     |        | 0,115   |
| central          | 8   | 11     | 23   |        | 2   | 18  | 11     |        | 11    | 13 | 18  | 7      |         |
| peripheral       | 16  | 19     | 23   | 0      | 31  | 16  | 11     | 11     | 24    | 15 | 8   |        |         |
| Stage            |     |        |      | 0,038* |     |     |        | 0,011* |       |    |     |        | 0,430   |
| I-II             | 9   | 12     | 28   |        | 2   | 18  | 11     |        | 18    | 15 | 18  | 9      |         |
| III-IV           | 15  | 18     | 18   | 0      | 31  | 16  | 4      | 9      | 24    | 13 | 5   |        |         |
| Grade (G)        |     |        |      | 0,700  |     |     |        | 0,7125 |       |    |     |        | 0,946   |
| G1-G2 (high)     | 13  | 19     | 28   |        | 0   | 30  | 17     |        | 13    | 14 | 25  | 15     |         |
| G3-G4 (low)      | 11  | 11     | 18   | 2      | 19  | 10  | 9      | 10     | 17    | 7  | 6   |        |         |
| Nodal status (N) |     |        |      | 0,265  |     |     |        | 0,059  |       |    |     |        | 0,131   |
| N0               | 7   | 9      | 19   |        | 1   | 13  | 9      |        | 12    | 13 | 12  | 5      |         |
| N+               | 17  | 21     | 27   | 1      | 36  | 18  | 10     | 11     | 30    | 17 | 7   |        |         |
| Tumor size (T)   |     |        |      | 0,012* |     |     |        | 0,005* |       |    |     |        | 0,348   |
| 1-2              | 10  | 13     | 32   |        | 2   | 20  | 14     |        | 19    | 15 | 23  | 11     |         |
| 3-4              | 14  | 17     | 14   | 0      | 29  | 13  | 3      | 9      | 19    | 11 | 6   |        |         |

Supplementary table 2

|                  | CD68 |        |      | p     | CD163 |        |      | p      | CD206 |     |        |      | p     |
|------------------|------|--------|------|-------|-------|--------|------|--------|-------|-----|--------|------|-------|
|                  | Low  | medium | high |       | low   | medium | high |        | 0     | low | medium | high |       |
| Histology        |      |        |      | 0,116 |       |        |      | 0,247  |       |     |        |      | 0,954 |
| AC               | 4    | 25     | 22   |       | 9     | 23     | 19   |        | 0     | 21  | 15     | 15   |       |
| SCC              | 5    | 13     | 31   | 10    | 12    | 27     | 1    | 22     | 8     | 18  |        |      |       |
| Location         |      |        |      | 0,244 |       |        |      | 0,960  |       |     |        |      | 0,755 |
| central          | 5    | 19     | 34   |       | 12    | 19     | 27   |        | 1     | 27  | 9      | 21   |       |
| peripheral       | 4    | 19     | 19   | 7     | 16    | 19     | 0    | 16     | 14    | 12  |        |      |       |
| Stage            |      |        |      | 0,509 |       |        |      | >0,999 |       |     |        |      | 0,338 |
| I-II             | 6    | 18     | 25   |       | 10    | 16     | 23   |        | 1     | 17  | 14     | 17   |       |
| III-IV           | 3    | 20     | 28   | 9     | 19    | 23     | 0    | 26     | 9     | 16  |        |      |       |
| Grade (G)        |      |        |      | 0,719 |       |        |      | >0,999 |       |     |        |      | 0,084 |
| G1-G2 (high)     | 4    | 26     | 30   |       | 12    | 20     | 28   |        | 1     | 20  | 17     | 22   |       |
| G3-G4 (low)      | 5    | 12     | 23   | 7     | 15    | 18     | 0    | 23     | 6     | 11  |        |      |       |
| Nodal status (N) |      |        |      | 0,214 |       |        |      | 0,429  |       |     |        |      | 0,406 |
| N0               | 5    | 14     | 16   |       | 9     | 11     | 15   |        | 1     | 11  | 11     | 12   |       |
| N+               | 4    | 24     | 37   | 10    | 24    | 31     | 0    | 32     | 12    | 21  |        |      |       |
| Tumor size (T)   |      |        |      | 0,989 |       |        |      | 0,512  |       |     |        |      | 0,376 |
| 1-2              | 5    | 21     | 29   |       | 8     | 21     | 26   |        | 0     | 20  | 18     | 17   |       |
| 3-4              | 4    | 17     | 24   | 11    | 14    | 20     | 1    | 23     | 5     | 16  |        |      |       |

|                  | CD204 |        |      | p      | CHID1 |        |      | p     |
|------------------|-------|--------|------|--------|-------|--------|------|-------|
|                  | low   | medium | high |        | low   | medium | high |       |
| Histology        |       |        |      | 0,086  |       |        |      | 0,156 |
| AC               | 15    | 21     | 15   |        | 10    | 18     | 23   |       |
| SCC              | 12    | 12     | 25   | 6      | 14    | 29     |      |       |
| Location         |       |        |      | 0,185  |       |        |      | 0,524 |
| central          | 13    | 19     | 26   |        | 7     | 11     | 24   |       |
| peripheral       | 14    | 14     | 14   | 9      | 21    | 28     |      |       |
| Stage            |       |        |      | 0,609  |       |        |      | 0,259 |
| I-II             | 15    | 15     | 19   |        | 6     | 15     | 28   |       |
| III-IV           | 12    | 18     | 21   | 10     | 17    | 24     |      |       |
| Grade (G)        |       |        |      | 0,037* |       |        |      | 0,992 |
| G1-G2 (high)     | 13    | 18     | 29   |        | 10    | 19     | 31   |       |
| G3-G4 (low)      | 14    | 15     | 11   | 6      | 13    | 21     |      |       |
| Nodal status (N) |       |        |      | 0,431  |       |        |      | 0,858 |
| N0               | 13    | 8      | 14   |        | 6     | 10     | 19   |       |
| N+               | 14    | 25     | 26   | 10     | 22    | 33     |      |       |
| Tumor size (T)   |       |        |      | 0,569  |       |        |      | 0,133 |
| 1-2              | 15    | 20     | 20   |        | 5     | 19     | 31   |       |
| 3-4              | 12    | 13     | 20   | 11     | 13    | 21     |      |       |
